# Supplementary material
Source: PubMed Central journal article supplement (PMC4378105)
Supplement: ASN.2014010108_ASN2014010108SupplementaryData.pdf [file ASN.2014010108_ASN2014010108SupplementaryData.pdf]

**SUPPLEMENTAL TABLES**

**Supplemental Table 1. Multivariable-adjusted associations of cardiac biomarkers and incident heart failure in the Chronic Renal Insufficiency Cohort (CRIC) Study including adjustment for ejection fraction and left ventricular mass index (N=2,327)**

|                                                           |                           | <b>Multivariable-Adjusted*</b> |                |
|-----------------------------------------------------------|---------------------------|--------------------------------|----------------|
|                                                           |                           | <b>HR (95%CI)</b>              | <b>p-value</b> |
| <b><u>Continuous Predictors</u></b>                       |                           |                                |                |
| Log(High sensitivity troponin T) per 1 SD (1.12) increase |                           | 1.29 (1.05-1.59)               | 0.02           |
| Log(NTproBNP) per 1 SD (1.39) increase                    |                           | 2.00 (1.63-2.46)               | <.0001         |
| <b><u>Categorical Predictors</u></b>                      |                           |                                |                |
| High sensitivity troponin T (pg/mL)                       | (Reference: Undetectable) |                                |                |
|                                                           | >5-9.3                    | 1.98 (0.89-4.37)               | 0.03           |
|                                                           | >9.3-15.0                 | 2.69 (1.26-5.75)               |                |
|                                                           | >15.0-26.5                | 2.53 (1.17-5.46)               |                |
|                                                           | >26.5                     | 3.49 (1.58-7.72)               |                |
| NTproBNP (pg/mL)                                          | (Reference: ≤ 47.6)       |                                |                |
|                                                           | >47.6-95.8                | 2.92 (0.97-8.78)               | <.0001         |
|                                                           | >95.8-188.8               | 4.76 (1.64-13.82)              |                |

|  |              |                    |  |
|--|--------------|--------------------|--|
|  | >188.8-433.0 | 6.82 (2.37-19.63)  |  |
|  | >433.0       | 11.76 (4.02-34.44) |  |

\*Models adjusted for age, sex, race/ethnicity, clinical center, diabetes status, self-reported CVD at baseline, current smoking, alcohol use, log(24-hour urine total protein excretion), eGFR, systolic blood pressure, BMI, LDL, HDL, hemoglobin, ACE/ARB use, diuretic use, beta-blocker use, serum phosphorus, log(PTH), log(FGF23), ejection fraction, and left ventricular mass index.

**Supplemental Table 2. Multivariable-adjusted associations of cardiac biomarkers and incident heart failure in the Chronic Renal Insufficiency Cohort (CRIC) Study among those free of any cardiovascular disease at study entry (N=2,329)**

|                                          |                           | <b>Multivariable-Adjusted*</b> |                |
|------------------------------------------|---------------------------|--------------------------------|----------------|
|                                          |                           | <b>HR (95%CI)</b>              | <b>p-value</b> |
| <b><u>Continuous Predictors</u></b>      |                           |                                |                |
| Log(Troponin T) per 1 SD (1.12) increase |                           | 1.48 (1.19-1.84)               | 0.0005         |
| Log(NTproBNP) per 1 SD (1.39) increase   |                           | 2.74 (2.20-3.43)               | <.0001         |
| <b><u>Categorical Predictors</u></b>     |                           |                                |                |
| High sensitivity troponin T (pg/mL)      | (Reference: Undetectable) |                                |                |
|                                          | >5-9.3                    | 2.15 (0.95-4.86)               | 0.001          |
|                                          | >9.3-15.0                 | 2.82 (1.30-6.11)               |                |
|                                          | >15.0-26.5                | 2.74 (1.22-6.13)               |                |
|                                          | >26.5                     | 5.25 (2.29-12.02)              |                |
| NTproBNP (pg/mL)                         | (Reference: ≤ 47.6)       |                                |                |
|                                          | >47.6-95.8                | 3.47 (1.14-10.59)              | <.0001         |
|                                          | >95.8-188.8               | 5.75 (1.95-16.97)              |                |
|                                          | >188.8-433.0              | 8.81 (3.00-25.92)              |                |
|                                          | >433.0                    | 19.82 (6.66-59.00)             |                |

\*Models adjusted for age, sex, race/ethnicity, clinical center, diabetes status, self-reported CVD at baseline, current smoking, alcohol use, log(24-hour urine total protein excretion), eGFR, systolic blood pressure, BMI, LDL, HDL, hemoglobin, ACE/ARB use, diuretic use, beta-blocker use, serum phosphorus, log(PTH), and log(FGF23).
